# Supplementary material
Source: publisher figshare collection journal article supplement (https://karger.figshare.com/articles/dataset/_/12005550)
Supplement: Supplementary file 1 [file 1]

Supplementary Table 1. Differences on the psychological variables between groups \*

| Variables                    | CALM (n=13)   | UC (n=12)     | p    |
|------------------------------|---------------|---------------|------|
| <b>T1</b>                    |               |               |      |
| PHQ-9                        | 8.38 ± 4.38   | 13 ± 6.67     | 0.05 |
| GAD7                         | 4.77 ± 3.27   | 13.1 ± 5.43   | 0.01 |
| DADDS                        | 14.31 ± 13.51 | 26.33 ± 7.15  | 0.02 |
| PTG-I Total                  | 65.69 ± 13.86 | 51.92 ± 22.24 | 0.01 |
| ECR-Anxiety                  | 24.38 ± 8.47  | 23.63 ± 11.41 | ns   |
| ECR-Avoidance                | 17.76 ± 4.39  | 17.54 ± 5.26  | ns   |
| FACIT-Total                  | 28.3 ± 8.2    | 28.6 ± 8.2    | ns   |
| QUAL-EC Relations            | 19.69 ± 3.77  | 19.81 ± 4.46  | ns   |
| QUAL-EC Preparation to death | 10.42 ± 3.81  | 11.94 ± 3.87  | ns   |
| QUAL-EC Completion of life   | 48.1 ± 9.02   | 48.45 ± 7.01  | ns   |
| <b>T2</b>                    |               |               |      |
| PHQ-9                        | 7.30 ± 4.1    | 14.30 ± 5.49  | 0.01 |
| GAD7                         | 5.1 ± 3.72    | 14.56 ± 5.17  | 0.01 |
| DADDS                        | 19.80 ± 14.68 | 31.33 ± 9.32  | 0.01 |
| PTG-I Total                  | 71.8 ± 13.14  | 52.1 ± 23.1   | 0.01 |
| ECR-Anxiety                  | 25.2 ± 8.67   | 27.5 ± 12.72  | ns   |
| ECR-Avoidance                | 15.8 ± 4.18   | 17 ± 7.5      | ns   |
| FACIT-Total                  | 33.88 ± 8.5   | 24 ± 10.3     | ns   |
| QUAL-EC Relations            | 18.9 ± 4.28   | 20 ± 3.96     | ns   |
| QUAL-EC Preparation to death | 10.65 ± 3.46  | 10.38 ± 4.21  | ns   |
| QUAL-EC Completion of life   | 51.22 ± 10.21 | 52.66 ± 13.39 | ns   |

\* Test U Mann-Whitney
